# Supplementary material for: Insights into the physiological, molecular, and genetic regulators of albinism in Camellia sinensis leaves
Source: Front Genet. 2023 Sep 6;14:1219335. doi: 10.3389/fgene.2023.1219335 (PMC10516542; doi:10.3389/fgene.2023.1219335)
Supplement: Supplementary file 2 [file Table3.XLSX]

## Sheet: Sheet1
Table S3. Expression profile of genes associated with chlorophyll and carotenoid biosynthesis
ID	G1_fpkm	G2_fpkm	G3_fpkm	A1_fpkm	A2_fpkm	A3_fpkm	G1_count	G2_count	G3_count	A1_count	A2_count	A3_count	chr	start	end	strand	Log2FC	Regulation	gene_description	KEGG	KEGG pathway	NR	Swissprot	Tremble	KOG	GO	Pfam	TF-Family	TF-Category	TF-Classification
TEA003616	4.58	4.05	2.8	2.36	1.93	1.91	68	63	46	42	34	32	Scaffold773	2582362	2585611	+	-1.054	down				chlorophyll a-b binding protein 8, chloroplastic [Quercus suber]	LHCA3_ARATH RecName: Full=Photosystem I chlorophyll a/b-binding protein 3-1, chloroplastic {ECO:0000303|PubMed:8115553}; Short=Lhca3*1 {ECO:0000303|PubMed:8115553}; AltName: Full=LHCI type III LHCA3 {ECO:0000305}; Flags: Precursor;	A0A6B9D0N5_9ERIC RecName: Full=Chlorophyll a-b binding protein, chloroplastic {ECO:0000256|RuleBase:RU363080};	At1g61520	GO:0009507,chloroplast; GO:0009534,chloroplast thylakoid; GO:0009535,chloroplast thylakoid membrane; GO:0016021,integral component of membrane; GO:0005634,nucleus; GO:0009522,photosystem I; GO:0010287,plastoglobule; GO:0009579,thylakoid; GO:0016168,chlorophyll binding; GO:0046872,metal ion binding; GO:0003729,mRNA binding; GO:0019904,protein domain specific binding; GO:0009768,photosynthesis, lig…	PF00504.21:Chlorophyll A-B binding protein	--	--	--
TEA013536	115.64	94.93	83.13	71.39	42.15	48.75	2417	2082	1923	1789	1044	1151	Scaffold1417	606899	610938	+	-1.0274	down	--	K00218 protochlorophyllide reductase [EC:1.3.1.33] | (RefSeq) protochlorophyllide reductase, chloroplastic (A)	ko00860: Porphyrin and chlorophyll metabolism; ko01100: Metabolic pathways; ko01110: Biosynthesis of secondary metabolites	protochlorophyllide reductase [Camellia sinensis]	PORA_CUCSA RecName: Full=Protochlorophyllide reductase, chloroplastic; Short=PCR; EC=1.3.1.33; AltName: Full=NADPH-protochlorophyllide oxidoreductase; Short=POR; Flags: Precursor;	A0A4S4ETZ6_CAMSI RecName: Full=NADPH-protochlorophyllide oxidoreductase {ECO:0000256|RuleBase:RU365001}; EC=1.3.1.33 {ECO:0000256|RuleBase:RU365001};	At5g54190	GO:0009507,chloroplast; GO:0016630,protochlorophyllide reductase activity; GO:0015995,chlorophyll biosynthetic process; GO:0015979,photosynthesis; GO:0003674,molecular_function; GO:0003824,catalytic activity; GO:0016491,oxidoreductase activity; GO:0016627,oxidoreductase activity, acting on the CH-CH group of donors; GO:0016628,oxidoreductase activity, acting on the CH-CH group of donors, NAD or N…	PF00106.25:short chain dehydrogenase	--	--	--
novel.14727	2.66	3.01	5.03	0.95	1.49	1.68	21	25	44	9	14	15	Scaffold1125	124415	125677	+	-1.5466	down	--	K08914 light-harvesting complex II chlorophyll a/b binding protein 3 | (RefSeq) chlorophyll a-b binding protein 13, chloroplastic (A)	ko00196: Photosynthesis - antenna proteins; ko01100: Metabolic pathways	PREDICTED: chlorophyll a-b binding protein 13, chloroplastic [Vitis vinifera]	CB23_SOLLC RecName: Full=Chlorophyll a-b binding protein 13, chloroplastic; AltName: Full=LHCII type III CAB-13; Flags: Precursor;	A0A4S4F1C7_CAMSI RecName: Full=Chlorophyll a-b binding protein, chloroplastic {ECO:0000256|RuleBase:RU363080};	At5g54270	GO:0009941,chloroplast envelope; GO:0009535,chloroplast thylakoid membrane; GO:0016021,integral component of membrane; GO:0009522,photosystem I; GO:0009523,photosystem II; GO:0010287,plastoglobule; GO:0016168,chlorophyll binding; GO:0046872,metal ion binding; GO:0009768,photosynthesis, light harvesting in photosystem I; GO:0018298,protein-chromophore linkage; GO:0009416,response to light stimulus…	PF00504.21:Chlorophyll A-B binding protein	--	--	--
TEA000051	0.2	0.19	0.37	0.98	1.48	2.92	5	5	10	29	43	81	Scaffold1195	242615	244037	-	2.6306	up	--	K08099 chlorophyllase [EC:3.1.1.14] | (RefSeq) chlorophyllase-2, chloroplastic (A)	ko00860: Porphyrin and chlorophyll metabolism; ko01100: Metabolic pathways; ko01110: Biosynthesis of secondary metabolites	chlorophyllase-2 [Camellia sinensis]	CLH2_ARATH RecName: Full=Chlorophyllase-2 {ECO:0000303|PubMed:10611389}; Short=AtCLH2 {ECO:0000303|PubMed:10611389}; EC=3.1.1.14 {ECO:0000269|PubMed:10611389}; AltName: Full=Chlorophyll-chlorophyllido hydrolase 2 {ECO:0000305}; Short=Chlase 2 {ECO:0000303|PubMed:10611389};	A0A4S4EYS5_CAMSI RecName: Full=Chlorophyllase {ECO:0000256|ARBA:ARBA00013226}; EC=3.1.1.14 {ECO:0000256|ARBA:ARBA00013226};	At5g43860	GO:0009507,chloroplast; GO:0005829,cytosol; GO:0047746,chlorophyllase activity; GO:0102293,pheophytinase b activity; GO:0015996,chlorophyll catabolic process; GO:0003674,molecular_function; GO:0003824,catalytic activity; GO:0016787,hydrolase activity; GO:0016788,hydrolase activity, acting on ester bonds; GO:0052689,carboxylic ester hydrolase activity; GO:0006725,cellular aromatic compound metabol…	PF07224.11:Chlorophyllase	--	--	--
TEA000127	0.52	0.46	0.1	3.12	2.72	6.63	14	13	3	101	87	202	Scaffold3282	802219	804229	+	3.35493	up	--	K08917 light-harvesting complex II chlorophyll a/b binding protein 6 | (RefSeq) chlorophyll a-b binding protein CP24 10A, chloroplastic-like (A)	ko00196: Photosynthesis - antenna proteins; ko01100: Metabolic pathways	Chlorophyll A-B binding protein [Macleaya cordata]	CB4A_SOLLC RecName: Full=Chlorophyll a-b binding protein CP24 10A, chloroplastic; Short=CAB-10A; Short=LHCP; Flags: Precursor;	A0A4S4DZ53_CAMSI RecName: Full=Chlorophyll a-b binding protein, chloroplastic {ECO:0000256|RuleBase:RU363080};	At1g15820_2	GO:0009535,chloroplast thylakoid membrane; GO:0016021,integral component of membrane; GO:0009523,photosystem II; GO:0016168,chlorophyll binding; GO:0009768,photosynthesis, light harvesting in photosystem I; GO:0018298,protein-chromophore linkage; GO:0009416,response to light stimulus; GO:0003674,molecular_function; GO:0005488,binding; GO:0046906,tetrapyrrole binding; GO:0097159,organic cyclic com…	PF00504.21:Chlorophyll A-B binding protein	--	--	--
TEA000184	1.8	2.76	2.18	3	4.74	9.21	41	66	55	82	128	237	Scaffold2087	219753	220538	-	1.14391	up	--	K08912 light-harvesting complex II chlorophyll a/b binding protein 1 | (RefSeq) chlorophyll a-b binding protein of LHCII type 1 (A)	ko00196: Photosynthesis - antenna proteins; ko01100: Metabolic pathways	PREDICTED: chlorophyll a-b binding protein of LHCII type 1 [Vitis vinifera]	CB24_TOBAC RecName: Full=Chlorophyll a-b binding protein 40, chloroplastic; AltName: Full=LHCII type I CAB-40; Short=LHCP; Flags: Precursor;	A0A4V3WMT3_CAMSI RecName: Full=Chlorophyll a-b binding protein, chloroplastic {ECO:0000256|RuleBase:RU363080};	At1g29930	GO:0009941,chloroplast envelope; GO:0009535,chloroplast thylakoid membrane; GO:0016021,integral component of membrane; GO:0009522,photosystem I; GO:0009523,photosystem II; GO:0010287,plastoglobule; GO:0016168,chlorophyll binding; GO:0046872,metal ion binding; GO:0009768,photosynthesis, light harvesting in photosystem I; GO:0018298,protein-chromophore linkage; GO:0009416,response to light stimulus…	PF00504.21:Chlorophyll A-B binding protein	--	--	--
TEA000227	3.08	4.46	5.57	1.03	1.35	2.18	25	38	50	10	13	20	Scaffold2493	190268	191160	.	-1.70177	down	--	K08907 light-harvesting complex I chlorophyll a/b binding protein 1 | (RefSeq) chlorophyll a-b binding protein 6A, chloroplastic (A)	ko00196: Photosynthesis - antenna proteins; ko01100: Metabolic pathways	PREDICTED: chlorophyll a-b binding protein 6A, chloroplastic [Nicotiana attenuata]	CB11_SOLLC RecName: Full=Chlorophyll a-b binding protein 6A, chloroplastic; AltName: Full=LHCI type I CAB-6A; AltName: Full=Light-harvesting complex I 26 kDa protein; Flags: Precursor;	A0A6B9D4Y7_9ERIC RecName: Full=Chlorophyll a-b binding protein, chloroplastic {ECO:0000256|RuleBase:RU363080};	At3g54890	GO:0009535,chloroplast thylakoid membrane; GO:0016021,integral component of membrane; GO:0009522,photosystem I; GO:0009523,photosystem II; GO:0016168,chlorophyll binding; GO:0046872,metal ion binding; GO:0009768,photosynthesis, light harvesting in photosystem I; GO:0018298,protein-chromophore linkage; GO:0009416,response to light stimulus; GO:0003674,molecular_function; GO:0005488,binding; GO:004…	--	--	--	--
TEA000300	0.29	0.29	0.3	0.49	1.02	1.17	14	15	16	29	59	65	Scaffold2408	1101649	1103846	-	1.44384	up	--	K22013 magnesium dechelatase [EC:4.99.1.10] | (RefSeq) protein STAY-GREEN, chloroplastic-like (A)	ko00860: Porphyrin and chlorophyll metabolism; ko01110: Biosynthesis of secondary metabolites	PREDICTED: protein STAY-GREEN, chloroplastic-like [Nicotiana attenuata]	SGR_CAPAN RecName: Full=Protein STAY-GREEN homolog, chloroplastic {ECO:0000305}; Short=CaSGR {ECO:0000303|PubMed:18427769}; AltName: Full=Protein CHLOROPHYLL RETAINER {ECO:0000303|PubMed:18359841}; Flags: Precursor;	A0A4V6RYI6_CAMSI RecName: Full=Staygreen domain-containing protein {ECO:0000259|Pfam:PF12638};	At4g11910	GO:0009507,chloroplast; GO:0015996,chlorophyll catabolic process; GO:0006725,cellular aromatic compound metabolic process; GO:0006778,porphyrin-containing compound metabolic process; GO:0006787,porphyrin-containing compound catabolic process; GO:0006807,nitrogen compound metabolic process; GO:0008150,biological_process; GO:0008152,metabolic process; GO:0009056,catabolic process; GO:0009987,cellul…	PF12638.7:Staygreen protein	--	--	--
TEA000303	2.11	1.92	1.38	7.35	4.28	9.75	22	21	16	92	53	115	Scaffold7413	78973	80460	.	1.80661	up	--	K02705 photosystem II CP43 chlorophyll apoprotein | (RefSeq) psbC; photosystem II 44 kDa protein (A)	ko00195: Photosynthesis; ko01100: Metabolic pathways	photosystem II 44 kDa protein (chloroplast) [Camellia sinensis]	PSBC_AETCO RecName: Full=Photosystem II CP43 reaction center protein {ECO:0000255|HAMAP-Rule:MF_01496}; AltName: Full=PSII 43 kDa protein {ECO:0000255|HAMAP-Rule:MF_01496}; AltName: Full=Protein CP-43 {ECO:0000255|HAMAP-Rule:MF_01496}; Flags: Precursor;	A0A6C0MBX8_9ERIC RecName: Full=Photosystem II reaction center protein Z {ECO:0000256|ARBA:ARBA00021665, ECO:0000256|HAMAP-Rule:MF_00644}; Short=PSII-Z {ECO:0000256|HAMAP-Rule:MF_00644};	AtCh019	GO:0009535,chloroplast thylakoid membrane; GO:0016021,integral component of membrane; GO:0009523,photosystem II; GO:0016168,chlorophyll binding; GO:0045156,electron transporter, transferring electrons within the cyclic electron transport pathway of photosynthesis activity; GO:0046872,metal ion binding; GO:0009772,photosynthetic electron transport in photosystem II; GO:0018298,protein-chromophore …	PF00421.19:Photosystem II protein	AP2/ERF-ERF	TF	AP2/ERF->AP2/ERF-ERF
TEA000346	1.16	0.51	1.45	1.93	3.68	5.21	13	6	18	26	49	66	Scaffold7475	333925	335602	-	1.62421	up	--	K04077 chaperonin GroEL | (RefSeq) chaperonin CPN60-like 2, mitochondrial (A)	ko03018: RNA degradation	NDR1/HIN1-like protein 6 [Olea europaea var. sylvestris]	NHL6_ARATH RecName: Full=NDR1/HIN1-like protein 6 {ECO:0000303|PubMed:26849212};	A0A4S4D5M7_CAMSI RecName: Full=LEA_2 domain-containing protein {ECO:0000259|Pfam:PF03168};	At5g36970	GO:0005829,cytosol; GO:0016021,integral component of membrane; GO:0005886,plasma membrane; GO:0009738,abscisic acid-activated signaling pathway; GO:0010116,positive regulation of abscisic acid biosynthetic process; GO:0009737,response to abscisic acid; GO:0006970,response to osmotic stress; GO:1902074,response to salt; GO:0007154,cell communication; GO:0007165,signal transduction; GO:0008150,biol…	PF03168.13:Late embryogenesis abundant protein	--	--	--
TEA000393	0.72	0.68	0.73	16.86	4.41	9.66	16	16	18	452	117	244	Scaffold413	2209471	2216617	+	3.69585	up	--	K17893 ubiquinol oxidase [EC:1.10.3.11] | (RefSeq) ubiquinol oxidase 4, chloroplastic/chromoplastic (A)	--	PREDICTED: ubiquinol oxidase 4, chloroplastic/chromoplastic [Vitis vinifera]	AOX4_ARATH RecName: Full=Ubiquinol oxidase 4, chloroplastic/chromoplastic; EC=1.10.3.11; AltName: Full=Alternative oxidase 4; AltName: Full=Plastid terminal oxidase; AltName: Full=Protein IMMUTANS; Flags: Precursor;	A0A4S4DPE8_CAMSI RecName: Full=Ubiquinol oxidase {ECO:0000256|RuleBase:RU003779}; EC=1.10.3.11 {ECO:0000256|RuleBase:RU003779};	At4g22260	GO:0009535,chloroplast thylakoid membrane; GO:0046862,chromoplast membrane; GO:0016021,integral component of membrane; GO:0005739,mitochondrion; GO:0070469,respirasome; GO:0009579,thylakoid; GO:0009916,alternative oxidase activity; GO:0046872,metal ion binding; GO:0102721,ubiquinol:oxygen oxidoreductase activity; GO:0010230,alternative respiration; GO:0016117,carotenoid biosynthetic process; GO:0…	PF01786.17:Alternative oxidase	--	--	--
TEA000402	2.15	2.24	1.8	10.41	13.29	25.38	54	59	50	313	395	719	Scaffold4012	226297	233600	-	2.80364	up	--	K05666 ATP-binding cassette, subfamily C (CFTR/MRP), member 2 | (RefSeq) ABC transporter C family member 3-like (A)	ko02010: ABC transporters	PREDICTED: ABC transporter C family member 3 [Juglans regia]	AB3C_ARATH RecName: Full=ABC transporter C family member 3; Short=ABC transporter ABCC.3; Short=AtABCC3; EC=7.6.2.2; AltName: Full=ATP-energized glutathione S-conjugate pump 3; AltName: Full=Glutathione S-conjugate-transporting ATPase 3; AltName: Full=Multidrug resistance-associated protein 3;	A0A4S4DQN6_CAMSI SubName: Full=Uncharacterized protein {ECO:0000313|EMBL:THG05399.1};	At3g13080	GO:0048046,apoplast; GO:0016021,integral component of membrane; GO:0016020,membrane; GO:0000325,plant-type vacuole; GO:0009506,plasmodesma; GO:0005774,vacuolar membrane; GO:0005773,vacuole; GO:0015431,ABC-type glutathione S-conjugate transporter activity; GO:0008559,ABC-type xenobiotic transporter activity; GO:0005524,ATP binding; GO:0042626,ATPase-coupled transmembrane transporter activity; GO:0…	PF00005.27:ABC transporter	--	--	--
TEA000443	20.94	23.28	31.94	57.9	74.25	70.86	282	329	476	935	1185	1078	Scaffold2121	1298912	1304433	-	1.24588	up	--	K14491 two-component response regulator ARR-B family | (RefSeq) two-component response regulator ARR2 isoform X1 (A)	ko04075: Plant hormone signal transduction	PREDICTED: two-component response regulator ARR1 isoform X2 [Ricinus communis]	ARR1_ARATH RecName: Full=Two-component response regulator ARR1;	A0A7J7GL06_CAMSI RecName: Full=Two-component response regulator {ECO:0000256|PIRNR:PIRNR036392};	At3g16857	GO:0005829,cytosol; GO:0005634,nucleus; GO:0003700,DNA-binding transcription factor activity; GO:0000156,phosphorelay response regulator activity; GO:0000976,transcription regulatory region sequence-specific DNA binding; GO:0090506,axillary shoot meristem initiation; GO:1990110,callus formation; GO:0071368,cellular response to cytokinin stimulus; GO:0009736,cytokinin-activated signaling pathway; …	PF00072.24:Response regulator receiver domain	--	--	--
TEA000445	2.3	2.44	2.37	3.84	9.49	10.64	36	40	41	72	176	188	Scaffold1483	1224	11213	+	1.57597	up	--	K05666 ATP-binding cassette, subfamily C (CFTR/MRP), member 2 | (RefSeq) ABC transporter C family member 3-like isoform X1 (A)	ko02010: ABC transporters	ABC transporter C family member 3 [Glycine soja]	AB3C_ARATH RecName: Full=ABC transporter C family member 3; Short=ABC transporter ABCC.3; Short=AtABCC3; EC=7.6.2.2; AltName: Full=ATP-energized glutathione S-conjugate pump 3; AltName: Full=Glutathione S-conjugate-transporting ATPase 3; AltName: Full=Multidrug resistance-associated protein 3;	A0A4S4ESK1_CAMSI SubName: Full=Uncharacterized protein {ECO:0000313|EMBL:THG19830.1};	At3g13080	GO:0048046,apoplast; GO:0016021,integral component of membrane; GO:0016020,membrane; GO:0000325,plant-type vacuole; GO:0009506,plasmodesma; GO:0005774,vacuolar membrane; GO:0005773,vacuole; GO:0015431,ABC-type glutathione S-conjugate transporter activity; GO:0008559,ABC-type xenobiotic transporter activity; GO:0005524,ATP binding; GO:0042626,ATPase-coupled transmembrane transporter activity; GO:0…	PF00005.27:ABC transporter	--	--	--
TEA000479	5.14	4.57	4.35	3.39	1.34	2.24	207	193	194	164	64	102	Scaffold2153	853895	865869	+	-1.18053	down	--	K03403 magnesium chelatase subunit H [EC:6.6.1.1] | (RefSeq) magnesium-chelatase subunit ChlH, chloroplastic (A)	ko00860: Porphyrin and chlorophyll metabolism; ko01100: Metabolic pathways; ko01110: Biosynthesis of secondary metabolites	magnesium chelatase H subunit [Camellia sinensis]	CHLH_ARATH RecName: Full=Magnesium-chelatase subunit ChlH, chloroplastic; Short=Mg-chelatase subunit H; EC=6.6.1.1; AltName: Full=ABA-binding protein; AltName: Full=Mg-protoporphyrin IX chelatase subunit ChlH; AltName: Full=Protein CONDITIONAL CHLORINA; AltName: Full=Protein GENOMES UNCOUPLED 5; AltName: Full=Protein RAPID TRANSPIRATION IN DETACHED LEAVES 1; Flags: Precursor;	A0A4S4EG52_CAMSI RecName: Full=Magnesium chelatase {ECO:0000256|ARBA:ARBA00012825}; EC=6.6.1.1 {ECO:0000256|ARBA:ARBA00012825};	At5g13630	GO:0009507,chloroplast; GO:0009706,chloroplast inner membrane; GO:0009570,chloroplast stroma; GO:0010007,magnesium chelatase complex; GO:0005739,mitochondrion; GO:0009536,plastid; GO:0005524,ATP binding; GO:0016851,magnesium chelatase activity; GO:0003729,mRNA binding; GO:0015995,chlorophyll biosynthetic process; GO:0015979,photosynthesis; GO:0000166,nucleotide binding; GO:0003674,molecular_funct…	PF02514.16:CobN/Magnesium Chelatase	--	--	--
TEA000535	200.56	233.04	213.69	16.45	33.82	16.47	6446	7859	7601	634	1288	598	Scaffold619	488245	503038	+	-3.44785	down	--	K23200 putative arabinosyltransferase [EC:2.4.2.-] | (RefSeq) probable arabinosyltransferase ARAD1 (A)	--	probable arabinosyltransferase ARAD1 [Arachis duranensis]	SUOX_ARATH RecName: Full=Sulfite oxidase; EC=1.8.3.1; AltName: Full=Moco-containing protein AtMCP; Short=At-SO; Short=AtSOX;	A0A7J7GIT4_CAMSI SubName: Full=Uncharacterized protein {ECO:0000313|EMBL:KAF5939851.1};	At3g01910	GO:0005829,cytosol; GO:0005739,mitochondrion; GO:0005777,peroxisome; GO:0020037,heme binding; GO:0030151,molybdenum ion binding; GO:0043546,molybdopterin cofactor binding; GO:0008482,sulfite oxidase activity; GO:0015994,chlorophyll metabolic process; GO:0010477,response to sulfur dioxide; GO:0006790,sulfur compound metabolic process; GO:0003674,molecular_function; GO:0005488,binding; GO:0046906,t…	--	--	--	--
TEA000602	0.03	0.15	0.06	1.96	2.58	2.79	1	5	2	76	99	102	Scaffold669	981719	982069	.	4.78781	up	--	K02492 glutamyl-tRNA reductase [EC:1.2.1.70] | (RefSeq) glutamyl-tRNA reductase 1, chloroplastic-like (A)	ko00860: Porphyrin and chlorophyll metabolism; ko01100: Metabolic pathways; ko01110: Biosynthesis of secondary metabolites; ko01240: Biosynthesis of cofactors	unnamed protein product, partial [Vitis vinifera]	HEM11_CUCSA RecName: Full=Glutamyl-tRNA reductase 1, chloroplastic; Short=GluTR; EC=1.2.1.70; Flags: Precursor;	A0A7J7G5D7_CAMSI SubName: Full=Uncharacterized protein {ECO:0000313|EMBL:KAF5935940.1};	--	GO:0009507,chloroplast; GO:0008883,glutamyl-tRNA reductase activity; GO:0050661,NADP binding; GO:0015995,chlorophyll biosynthetic process; GO:0006782,protoporphyrinogen IX biosynthetic process; GO:0003674,molecular_function; GO:0003824,catalytic activity; GO:0016491,oxidoreductase activity; GO:0016620,oxidoreductase activity, acting on the aldehyde or oxo group of donors, NAD or NADP as acceptor;…	--	--	--	--
TEA000621	0.43	0.57	0.12	1.22	1.49	2.4	10	14	3	34	41	63	Scaffold737	2044664	2044938	.	2.00521	up	--	K02492 glutamyl-tRNA reductase [EC:1.2.1.70] | (Kazusa) Lj2g3v2161690.1; - (A)	ko00860: Porphyrin and chlorophyll metabolism; ko01100: Metabolic pathways; ko01110: Biosynthesis of secondary metabolites; ko01240: Biosynthesis of cofactors	PREDICTED: glutamyl-tRNA reductase 1, chloroplastic, partial [Nicotiana sylvestris]	HEM11_CUCSA RecName: Full=Glutamyl-tRNA reductase 1, chloroplastic; Short=GluTR; EC=1.2.1.70; Flags: Precursor;	A0A660KM22_9ROSI RecName: Full=GlutR_N domain-containing protein {ECO:0000259|Pfam:PF05201};	At1g09940	GO:0009507,chloroplast; GO:0008883,glutamyl-tRNA reductase activity; GO:0050661,NADP binding; GO:0015995,chlorophyll biosynthetic process; GO:0006782,protoporphyrinogen IX biosynthetic process; GO:0003674,molecular_function; GO:0003824,catalytic activity; GO:0016491,oxidoreductase activity; GO:0016620,oxidoreductase activity, acting on the aldehyde or oxo group of donors, NAD or NADP as acceptor;…	PF05201.15:Glutamyl-tRNAGlu reductase, N-terminal domain	--	--	--
TEA000669	0.72	1.17	2.21	2.8	4.69	4.04	38	65	130	178	295	242	Scaffold14455	402	1164	-	1.32624	up	--	K00387 sulfite oxidase [EC:1.8.3.1] | (RefSeq) sulfite oxidase-like (A)	ko00920: Sulfur metabolism; ko01100: Metabolic pathways	sulfite oxidase-like [Cucurbita moschata]	SUOX_ARATH RecName: Full=Sulfite oxidase; EC=1.8.3.1; AltName: Full=Moco-containing protein AtMCP; Short=At-SO; Short=AtSOX;	A0A6J1K347_CUCMA SubName: Full=sulfite oxidase-like {ECO:0000313|RefSeq:XP_022993718.1};	At3g01910	GO:0005829,cytosol; GO:0005739,mitochondrion; GO:0005777,peroxisome; GO:0020037,heme binding; GO:0030151,molybdenum ion binding; GO:0043546,molybdopterin cofactor binding; GO:0008482,sulfite oxidase activity; GO:0015994,chlorophyll metabolic process; GO:0010477,response to sulfur dioxide; GO:0006790,sulfur compound metabolic process; GO:0003674,molecular_function; GO:0005488,binding; GO:0046906,t…	--	--	--	--
TEA000708	2.6	2.41	2	10.13	13.25	11.09	81	79	69	379	490	391	Scaffold1757	911591	912017	.	2.12788	up	--	K04035 magnesium-protoporphyrin IX monomethyl ester (oxidative) cyclase [EC:1.14.13.81] | (RefSeq) magnesium-protoporphyrin IX monomethyl ester [oxidative] cyclase, chloroplastic (A)	ko00860: Porphyrin and chlorophyll metabolism; ko01100: Metabolic pathways; ko01110: Biosynthesis of secondary metabolites	PREDICTED: magnesium-protoporphyrin IX monomethyl ester [oxidative]	CRD1_EUPES RecName: Full=Magnesium-protoporphyrin IX monomethyl ester [oxidative] cyclase, chloroplastic; Short=Mg-protoporphyrin IX monomethyl ester oxidative cyclase; EC=1.14.13.81; Flags: Precursor;	A0A2U8UYG7_CAMSI RecName: Full=Magnesium-protoporphyrin IX monomethyl ester (oxidative) cyclase {ECO:0000256|ARBA:ARBA00012092}; EC=1.14.13.81 {ECO:0000256|ARBA:ARBA00012092};	At3g56940	GO:0009507,chloroplast; GO:0048529,magnesium-protoporphyrin IX monomethyl ester (oxidative) cyclase activity; GO:0046872,metal ion binding; GO:0015995,chlorophyll biosynthetic process; GO:0015979,photosynthesis; GO:0003674,molecular_function; GO:0003824,catalytic activity; GO:0004497,monooxygenase activity; GO:0016491,oxidoreductase activity; GO:0016705,oxidoreductase activity, acting on paired d…	--	--	--	--
TEA000749	0.96	1.35	2.29	4.69	3.09	5.9	23	34	61	135	88	160	Scaffold2251	416612	419677	-	1.39851	up	--	--	--	unnamed protein product, partial [Vitis vinifera]	CIP7_ARATH RecName: Full=COP1-interacting protein 7 {ECO:0000303|PubMed:9668129};	A0A7J7GM65_CAMSI SubName: Full=Uncharacterized protein {ECO:0000313|EMBL:KAF5941889.1};	At5g43310	GO:0005634,nucleus; GO:0005886,plasma membrane; GO:0009718,anthocyanin-containing compound biosynthetic process; GO:0015995,chlorophyll biosynthetic process; GO:0045893,positive regulation of transcription, DNA-templated; GO:0009416,response to light stimulus; GO:0008150,biological_process; GO:0008152,metabolic process; GO:0009058,biosynthetic process; GO:0009812,flavonoid metabolic process; GO:0…	--	MYB	TF	MYB->MYB
TEA000784	22.38	18.93	16.77	8.31	4.47	6.97	1114	989	924	496	264	392	Scaffold4138	2178514	2179662	-	-1.7295	down	--	K09753 cinnamoyl-CoA reductase [EC:1.2.1.44] | (RefSeq) cinnamoyl-CoA reductase 2-like (A)	ko00940: Phenylpropanoid biosynthesis; ko01100: Metabolic pathways; ko01110: Biosynthesis of secondary metabolites	cinnamoyl-CoA reductase family protein [Camellia sinensis]	CCR1_PETHY RecName: Full=Cinnamoyl-CoA reductase 1 {ECO:0000303|PubMed:24985707, ECO:0000303|PubMed:25217505}; Short=PhCCR1 {ECO:0000303|PubMed:24985707, ECO:0000303|PubMed:25217505}; EC=1.2.1.44 {ECO:0000250|UniProtKB:Q9S9N9}; AltName: Full=Coniferylaldehyde synthase {ECO:0000305}; EC=1.2.1.- {ECO:0000269|PubMed:24985707, ECO:0000269|PubMed:25217505};	A0A4V3WNJ3_CAMSI RecName: Full=Epimerase domain-containing protein {ECO:0000259|Pfam:PF01370};	At2g33590	GO:0005737,cytoplasm; GO:0016621,cinnamoyl-CoA reductase activity; GO:0000166,nucleotide binding; GO:0007623,circadian rhythm; GO:0010597,green leaf volatile biosynthetic process; GO:0009809,lignin biosynthetic process; GO:0009699,phenylpropanoid biosynthetic process; GO:0003674,molecular_function; GO:0003824,catalytic activity; GO:0016491,oxidoreductase activity; GO:0016620,oxidoreductase activi…	PF01370.21:NAD dependent epimerase/dehydratase family	--	--	--
TEA000825	18.82	17.94	19.01	9.13	12.15	7.55	289	289	323	168	221	131	Scaffold51	408173	409195	+	-1.11957	down	--	K09753 cinnamoyl-CoA reductase [EC:1.2.1.44] | (RefSeq) cinnamoyl-CoA reductase 1-like (A)	ko00940: Phenylpropanoid biosynthesis; ko01100: Metabolic pathways; ko01110: Biosynthesis of secondary metabolites	PREDICTED: cinnamoyl-CoA reductase 1-like [Prunus mume]	CCR1_PETHY RecName: Full=Cinnamoyl-CoA reductase 1 {ECO:0000303|PubMed:24985707, ECO:0000303|PubMed:25217505}; Short=PhCCR1 {ECO:0000303|PubMed:24985707, ECO:0000303|PubMed:25217505}; EC=1.2.1.44 {ECO:0000250|UniProtKB:Q9S9N9}; AltName: Full=Coniferylaldehyde synthase {ECO:0000305}; EC=1.2.1.- {ECO:0000269|PubMed:24985707, ECO:0000269|PubMed:25217505};	A0A7J7FR71_CAMSI SubName: Full=Uncharacterized protein {ECO:0000313|EMBL:KAF5930762.1};	At5g58490	GO:0005737,cytoplasm; GO:0016621,cinnamoyl-CoA reductase activity; GO:0000166,nucleotide binding; GO:0007623,circadian rhythm; GO:0010597,green leaf volatile biosynthetic process; GO:0009809,lignin biosynthetic process; GO:0009699,phenylpropanoid biosynthetic process; GO:0003674,molecular_function; GO:0003824,catalytic activity; GO:0016491,oxidoreductase activity; GO:0016620,oxidoreductase activi…	PF01073.19:3-beta hydroxysteroid dehydrogenase/isomerase family	MYB	TF	MYB->MYB
TEA000834	4.4	4.46	3.73	0.69	1.62	0.97	32	34	30	6	14	8	Scaffold1939	449403	457421	-	-2.10947	down	--	K00454 lipoxygenase [EC:1.13.11.12] | (RefSeq) linoleate 13S-lipoxygenase 2-1, chloroplastic-like (A)	ko00591: Linoleic acid metabolism; ko00592: alpha-Linolenic acid metabolism; ko01100: Metabolic pathways; ko01110: Biosynthesis of secondary metabolites	lipoxygenase [Camellia sinensis]	LOX21_SOLTU RecName: Full=Linoleate 13S-lipoxygenase 2-1, chloroplastic; EC=1.13.11.12; AltName: Full=Lipoxygenase 2-1; Flags: Precursor;	A0A4P8L7V6_9ERIC RecName: Full=Lipoxygenase {ECO:0000256|RuleBase:RU003975}; EC=1.13.11.- {ECO:0000256|RuleBase:RU003975};	At3g45140	GO:0009570,chloroplast stroma; GO:0009534,chloroplast thylakoid; GO:0016165,linoleate 13S-lipoxygenase activity; GO:0046872,metal ion binding; GO:0016702,oxidoreductase activity, acting on single donors with incorporation of molecular oxygen, incorporation of two atoms of oxygen; GO:0006633,fatty acid biosynthetic process; GO:0010597,green leaf volatile biosynthetic process; GO:0034440,lipid oxid…	PF00305.19:Lipoxygenase	--	--	--
TEA000883	1.69	2.38	3.82	0.98	1.64	1.04	46	68	115	32	53	32	Scaffold4317	389456	389941	.	-1.27007	down	--	K00465 carotenoid 9,10(9',10')-cleavage dioxygenase 1 [EC:1.13.11.-] | (RefSeq) carotenoid 9,10(9',10')-cleavage dioxygenase 1 (A)	--	carotenoid cleavage dioxygenase [Camellia sinensis]	CCD1_PEA RecName: Full=Carotenoid 9,10(9',10')-cleavage dioxygenase 1; EC=1.14.99.n4; AltName: Full=PsCCD1; AltName: Full=PsNCED1;	A0A1L5JJ07_CAMSI SubName: Full=Carotenoid cleavage dioxygenase {ECO:0000313|EMBL:APO15143.1};	At3g63520	GO:0046872,metal ion binding; GO:0016702,oxidoreductase activity, acting on single donors with incorporation of molecular oxygen, incorporation of two atoms of oxygen; GO:0003674,molecular_function; GO:0005488,binding; GO:0043167,ion binding; GO:0043169,cation binding; GO:0003824,catalytic activity; GO:0016491,oxidoreductase activity; GO:0016701,oxidoreductase activity, acting on single donors wi…	--	--	--	--
TEA000887	1.58	1.76	1.98	5.32	6.42	7.52	23	27	32	93	111	124	Scaffold2122	62235	70507	-	1.68066	up	--	K04564 superoxide dismutase, Fe-Mn family [EC:1.15.1.1] | (RefSeq) superoxide dismutase [Fe], chloroplastic-like (A)	ko04146: Peroxisome	iron superoxide dismutase 1a [Camellia sinensis]	SODF2_ARATH RecName: Full=Superoxide dismutase [Fe] 2, chloroplastic; EC=1.15.1.1; AltName: Full=Protein ALBINO OR PALE GREEN 8; AltName: Full=Protein FE SUPEROXIDE DISMUTASE 2; Flags: Precursor;	A0A4S4EGS3_CAMSI RecName: Full=Superoxide dismutase {ECO:0000256|ARBA:ARBA00012682}; EC=1.15.1.1 {ECO:0000256|ARBA:ARBA00012682};	At5g51100	GO:0009507,chloroplast; GO:0042644,chloroplast nucleoid; GO:0009534,chloroplast thylakoid; GO:0009579,thylakoid; GO:0046872,metal ion binding; GO:0004784,superoxide dismutase activity; GO:0009411,response to UV; GO:0003674,molecular_function; GO:0005488,binding; GO:0043167,ion binding; GO:0043169,cation binding; GO:0003824,catalytic activity; GO:0016209,antioxidant activity; GO:0016491,oxidoreduc…	PF00081.22:Iron/manganese superoxide dismutases, alpha-hairpin domain	--	--	--
TEA000909	100.72	92.07	88.35	53.39	48.5	39.35	3016	2893	2928	1917	1721	1331	Scaffold3159	1212604	1215404	+	-1.16281	down	--	K04564 superoxide dismutase, Fe-Mn family [EC:1.15.1.1] | (RefSeq) superoxide dismutase [Fe], chloroplastic-like (A)	ko04146: Peroxisome	iron superoxide dismutase 1a [Camellia sinensis]	SODF2_ARATH RecName: Full=Superoxide dismutase [Fe] 2, chloroplastic; EC=1.15.1.1; AltName: Full=Protein ALBINO OR PALE GREEN 8; AltName: Full=Protein FE SUPEROXIDE DISMUTASE 2; Flags: Precursor;	A0A7J7I403_CAMSI RecName: Full=Superoxide dismutase {ECO:0000256|ARBA:ARBA00012682}; EC=1.15.1.1 {ECO:0000256|ARBA:ARBA00012682};	At5g51100	GO:0009507,chloroplast; GO:0042644,chloroplast nucleoid; GO:0009534,chloroplast thylakoid; GO:0009579,thylakoid; GO:0046872,metal ion binding; GO:0004784,superoxide dismutase activity; GO:0009411,response to UV; GO:0003674,molecular_function; GO:0005488,binding; GO:0043167,ion binding; GO:0043169,cation binding; GO:0003824,catalytic activity; GO:0016209,antioxidant activity; GO:0016491,oxidoreduc…	PF00081.22:Iron/manganese superoxide dismutases, alpha-hairpin domain	--	--	--
TEA000978	0.65	0.56	0.53	2.36	1.44	2.19	11	10	10	48	29	42	Scaffold9739	149409	150964	.	1.61163	up	--	K02835 peptide chain release factor 1 | (RefSeq) peptide chain release factor APG3, chloroplastic (A)	--	RF-1 domain-containing protein/PCRF domain-containing protein [Cephalotus follicularis]	APG3_ARATH RecName: Full=Peptide chain release factor APG3, chloroplastic {ECO:0000305}; AltName: Full=Chloroplast ribosome release factor 1 {ECO:0000303|PubMed:17450416}; Short=AtcpRF1 {ECO:0000303|PubMed:17450416}; AltName: Full=Protein ALBINO AND PALE GREEN 3 {ECO:0000303|PubMed:17450416}; Flags: Precursor;	A0A7J7FSI6_CAMSI RecName: Full=RF_PROK_I domain-containing protein {ECO:0000259|PROSITE:PS00745};	At3g62910	GO:0009507,chloroplast; GO:0003747,translation release factor activity; GO:0016149,translation release factor activity, codon specific; GO:0009658,chloroplast organization; GO:0032544,plastid translation; GO:0040008,regulation of growth; GO:0010027,thylakoid membrane organization; GO:0006415,translational termination; GO:0003674,molecular_function; GO:0003676,nucleic acid binding; GO:0003723,RNA …	--	--	--	--
